# Supplementary material
Source: Springer Nature journal article supplement (https://www.springermedizin.de/resource/supplementary/13014_2011_506_MOESM6_ESM.pdf/9633548)

Total length of copy number  
aberrations (log Mb)

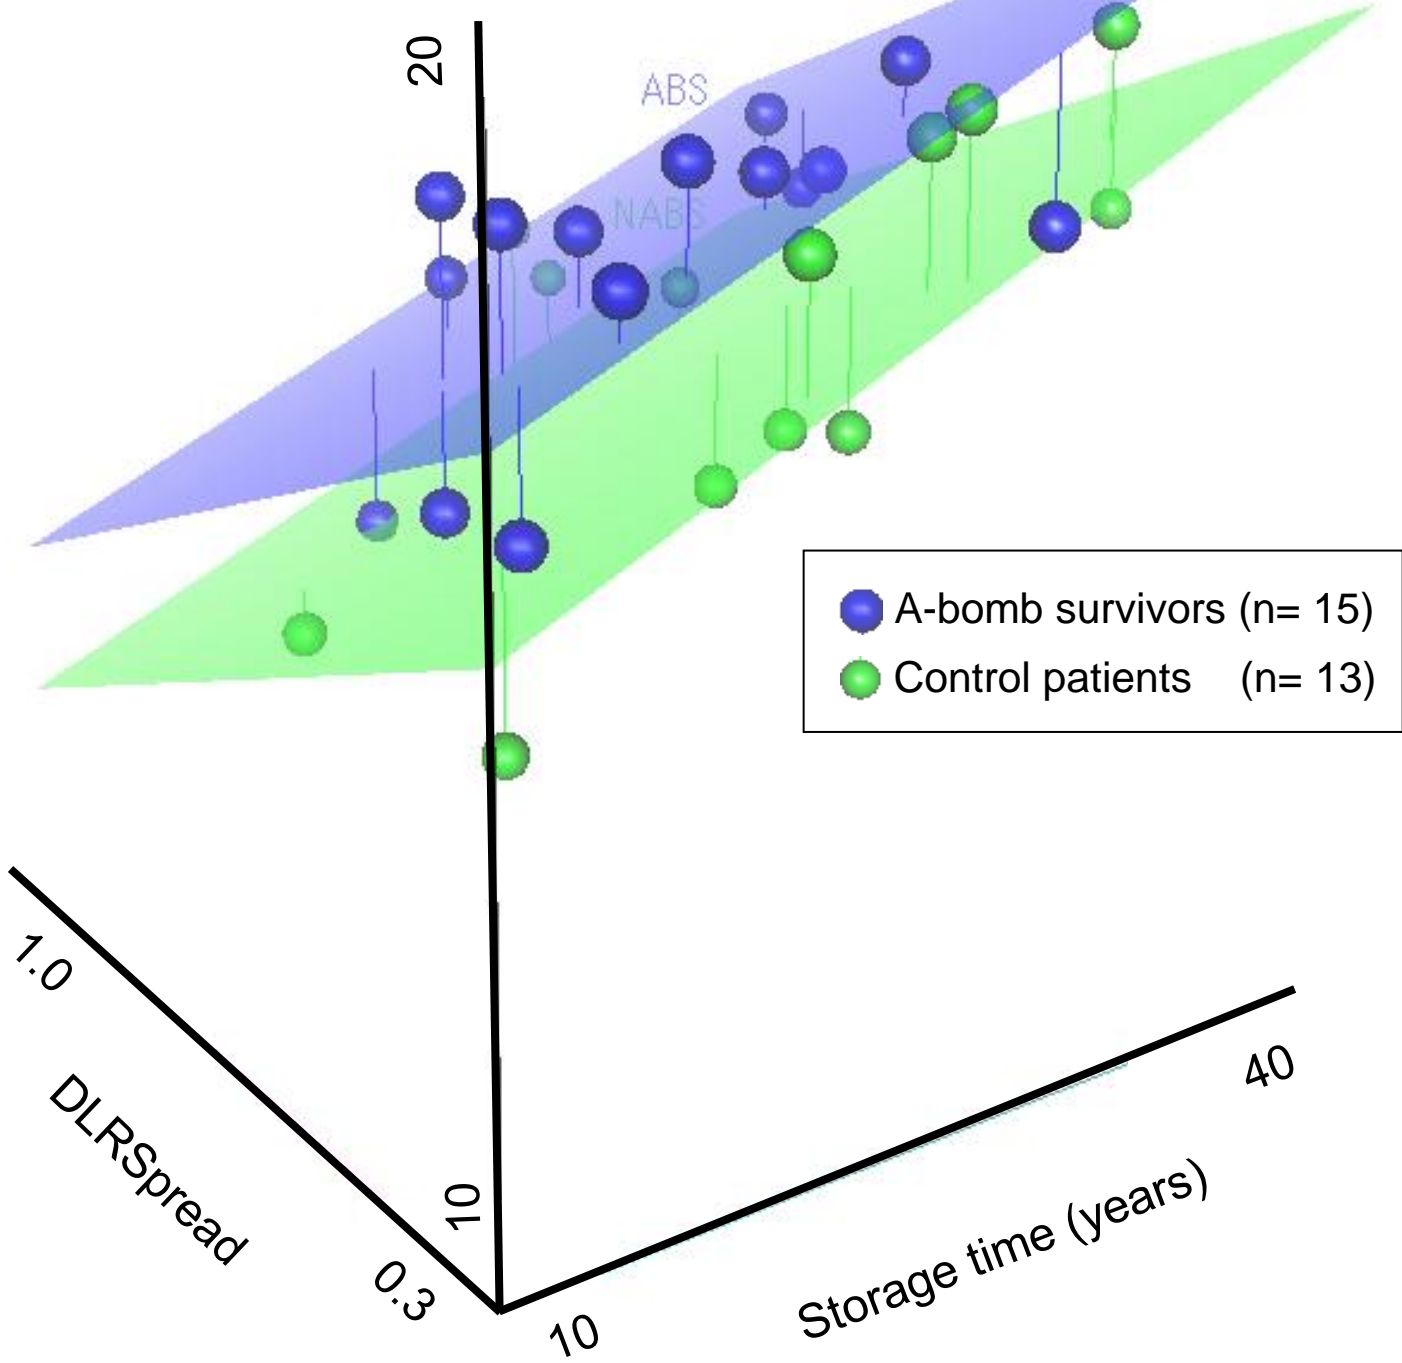

Supplement: MOESM6 [file 9633548]
